# Supplementary material for: 3D Photogrammetric Survey, Raking Light Photography and Mapping of Degradation Phenomena of the Early Renaissance Wall Paintings by Saturnino Gatti—Case Study of the St. Panfilo Church in Tornimparte (L’Aquila, Italy)
Source: MDPI journal article supplement (doi:10.3390/app13095689), 2023-05-05
Supplement: s1 [file s1 › Figure S2.pdf]

Supplementary file for:

# 3D Photogrammetric Survey, Raking Light Photography and Mapping of Degradation Phenomena of the Early Renaissance Wall Paintings by Saturnino Gatti – Case Study of the St. Panfilo Church in Tornimparte (L’Aquila, Italy)

Luca Lanteri <sup>1,†</sup>, Sara Calandra <sup>2,3,†</sup>, Francesca Briani <sup>4</sup>, Chiara Germinario <sup>5</sup>, Francesco Izzo <sup>6,7,\*</sup>, Sabrina Pagano <sup>8</sup>, Claudia Pelosi <sup>1</sup> and Alba Patrizia Santo <sup>2</sup>

- <sup>1</sup> Department of Economics, Engineering, Society and Business Organization, University of Tuscia, 01100 Viterbo, Italy; llanteri@unitus.it (L.L.); pelosi@unitus.it (C.P.)
- <sup>2</sup> Department of Earth Sciences, University of Florence, 50121 Florence, Italy; sara.calandra@unifi.it (S.C.); alba.santo@unifi.it (A.P.S.)
- <sup>3</sup> Department of Chemistry, University of Florence, 50019 Florence, Italy
- <sup>4</sup> ADARTE Snc, 50141 Florence, Italy; francescabriani@adartesnc.it
- <sup>5</sup> Department of Sciences and Technology, University of Sannio, Via De Sanctis Snc, 82100 Benevento, Italy; chiara.germinario@unisannio.it
- <sup>6</sup> Department of Earth Sciences, Environment and Resources, University of Naples Federico II, Via Cinthia, 80126 Naples, Italy
- <sup>7</sup> Center of Research on Archaeometry and Conservation Science, Via Cinthia, 21, 80126 Naples, Italy
- <sup>8</sup> Department of Science of Antiquities, Sapienza Università di Roma, Piazzale Aldo Moro 5, 00185 Rome, Italy; sabrina.pagano@uniroma1.it
- \* Correspondence: francesco.izzo4@unina.it
- † These authors contributed equally to this work.

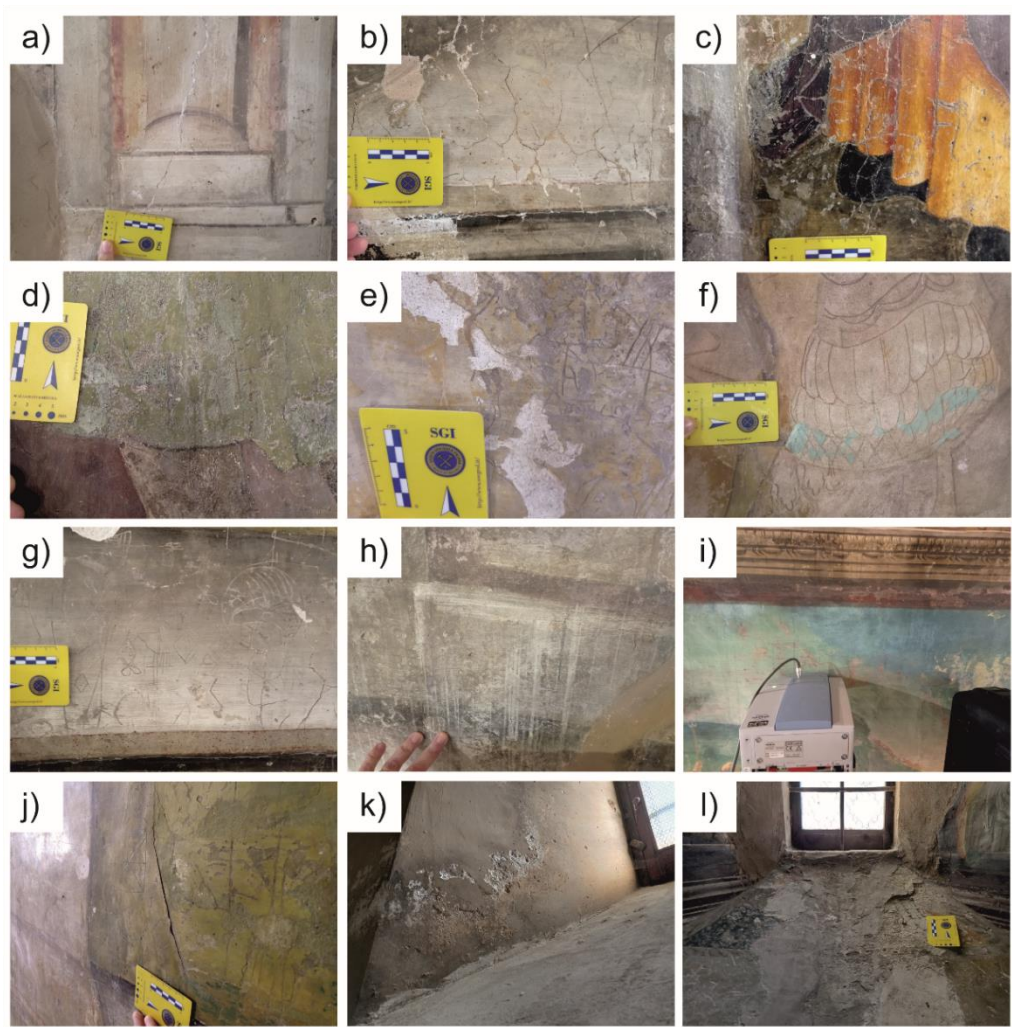

**Figure S2.** Some pictures of weathering forms affecting the apsidal conch of San Panfilo Church in Tornimparte (AQ, Italy): a) individual fissure on panel A; b) and c) network of cracks (*craquele*) on panel A and E, respectively; d) minor detachments affecting the pictorial layers on panel A; e) missing parts (*lacuna*); f) pouncing and the incision marks on panel A; g) *graffiti* (scratching) on panel A; h) surface deposits on panel B; i) color changes due to transformation of azurite in malachite on panel A; j) surface wall deformation on panel A; k) efflorescence on panel A; l) detachment on panel A.
